# Supplementary material
Source: PubMed Central journal article supplement (PMC8728892)
Supplement: NIHMS1765225-supplement-Supplementary.pdf [file NIHMS1765225-supplement-Supplementary.pdf]

## Electronic Supplementary Information (ESI)

# Enhanced targeting of triple-negative breast carcinoma and malignant melanoma by photochemical internalization of CSPG4-targeting immunotoxins

M. S. Eng,<sup>a</sup> J. Kaur,<sup>a</sup> L. Prasmickaite,<sup>b</sup> B. Ø. Engesæter,<sup>b</sup> A. Weyergang,<sup>a</sup>  
E. Skarpen,<sup>c</sup> K. Berg,<sup>a</sup> M. G. Rosenblum,<sup>d</sup> G. M. Mælandsmo,<sup>b</sup> A. Høgset,<sup>e</sup> S.  
Ferrone<sup>f</sup> and P. K. Selbo<sup>a,†</sup>

<sup>a</sup> Department of Radiation Biology, Institute for Cancer Research, The Norwegian Radium Hospital, Oslo University Hospital, Oslo, Norway.

<sup>b</sup> Department of Tumor Biology, Institute for Cancer Research, The Norwegian Radium Hospital, Oslo University Hospital, Oslo, Norway

<sup>c</sup> Department of Core Facilities, Institute for Cancer Research, The Norwegian Radium Hospital, Oslo University Hospital, Oslo, Norway

<sup>d</sup> Department of Experimental Therapeutics, University of Texas M.D. Anderson Cancer Center, Houston, TX, USA

<sup>e</sup> PCI Biotech AS, Oslo, Norway

<sup>f</sup> Department of Surgery, Massachusetts General Hospital, Harvard Medical School, Boston, MA, USA

†Corresponding author: Department of Radiation Biology, Institute for Cancer Research, The Norwegian Radium Hospital, Oslo University Hospital, Montebello, Oslo, 0310, Norway. Tel: +4722781469; E-mail: [selbo@rr-research.no](mailto:selbo@rr-research.no)

# Supplementary Fig. 1

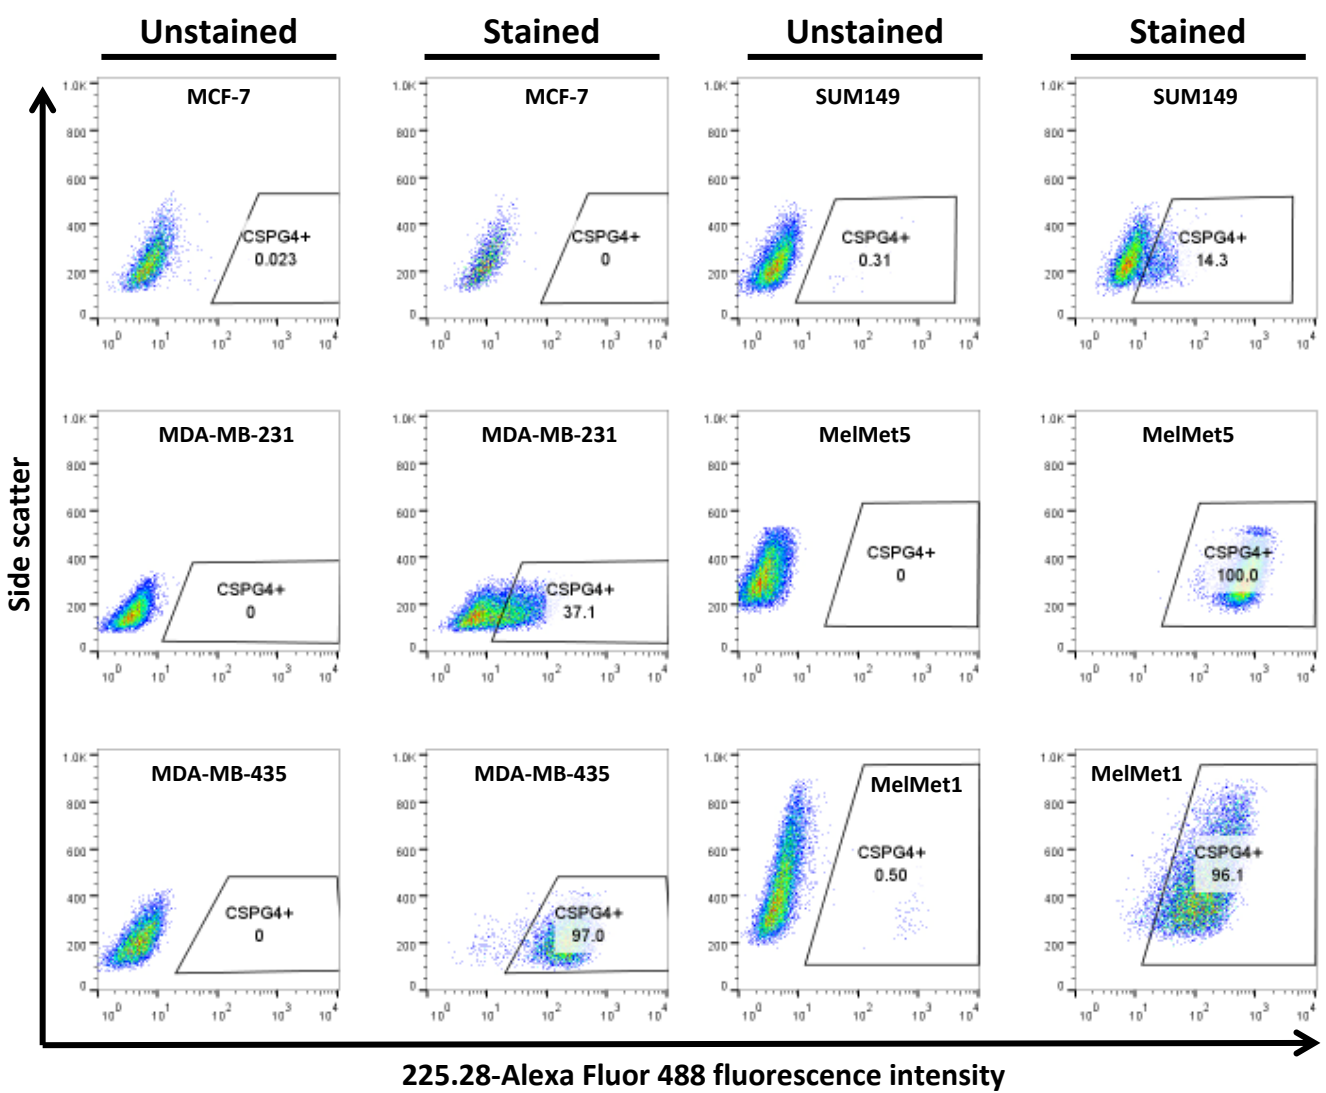

**Supplementary Fig. S1. Surface expression of CSPG4 evaluated by flow cytometry and presented as a dot plot of side scatter versus 225.28-Alexa Fluor 488 staining (same data as Figure 1). Number in each gate represents percentage of cells defined as CSPG4+. Figure shows a single representative experiment out of three independent experiments.**

## Supplementary Fig. 2

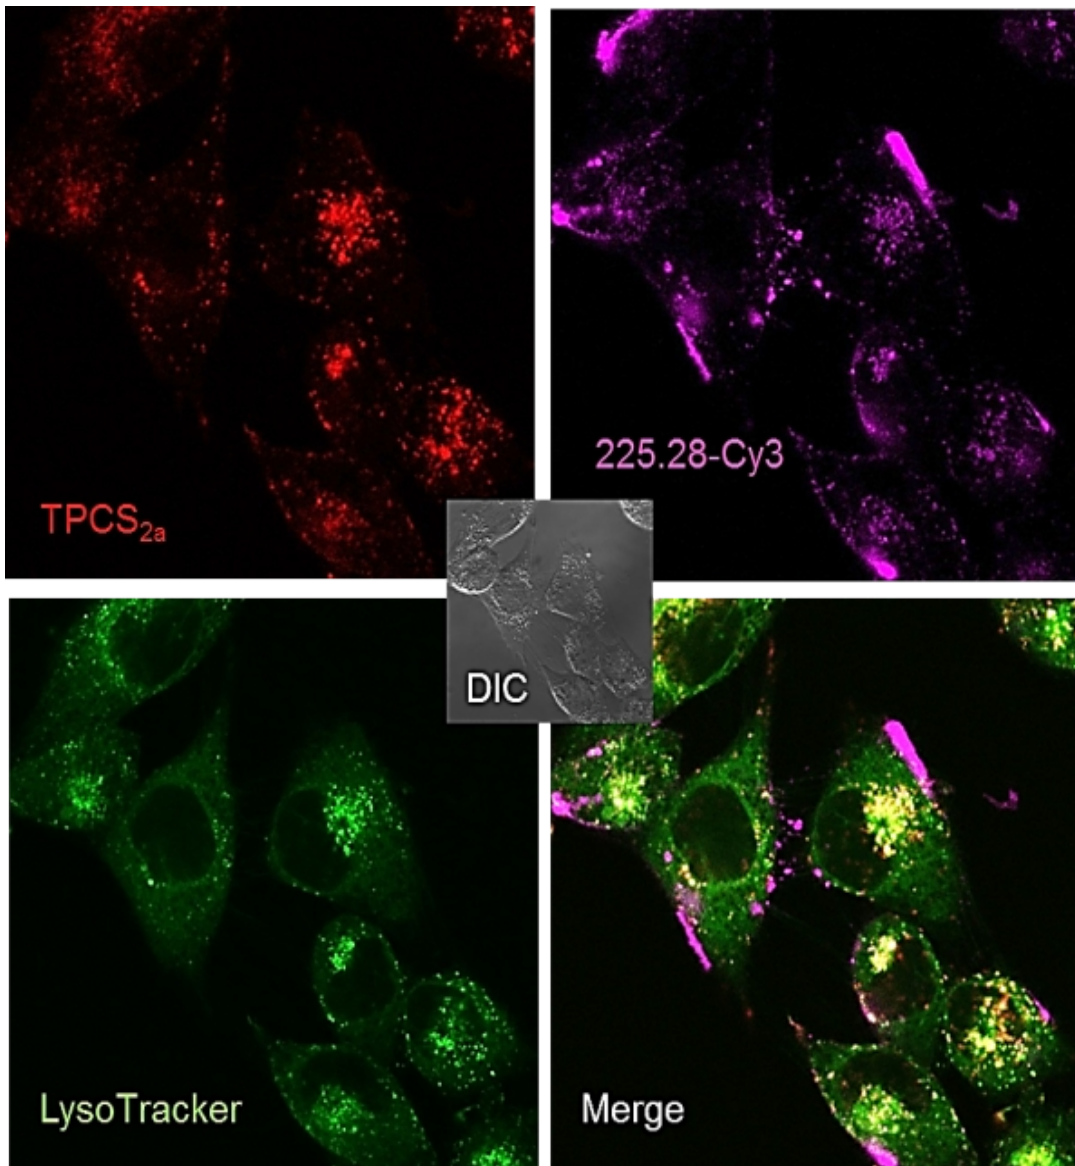

**Supplementary Figure S2. The CSPG4-targeting mAb 225.28-mAb co-localizes with the PCI photosensitizer TPCS<sub>2a</sub> and LysoTracker.** Confocal microscopy of MDA-MB-435 cells reveals partly co-localization of TPCS<sub>2a</sub>, 225.28-Cy3<sup>®</sup>. 1 µg/ml TPCS<sub>2a</sub> was co-incubated with Cy3-labelled, CSPG4-recognizing mAbs (30 nM), 225.28 for 18 h. directly on coverslips, washed and chased for 4 h. prior to investigation. LysoTracker<sup>®</sup> Green, a dye accumulating in endo-lysosomal compartments was added 1-2 h. prior examination.

Degree of co-localization in a set of four different micrographs with 5-10 cells/picture. For 225.28-Cy3 there is around 63% co-localization (Manders) with TPCS<sub>2a</sub>, and of this population the majority (78%) is co-localized with LysoTracker Green. Hence, co-localization measurements indicate that 49% of TPCS<sub>2a</sub>, 225.28-Cy3 and LysoTracker green is co-localised, which is in line with a previous work where we studied co-localization of the same photosensitizer and LysoTracker Green with an antibody targeting CD133 (Bostad et al. 2013: <https://doi.org/10.1016/j.jconrel.2013.03.023>).

# Supplementary Fig. 3

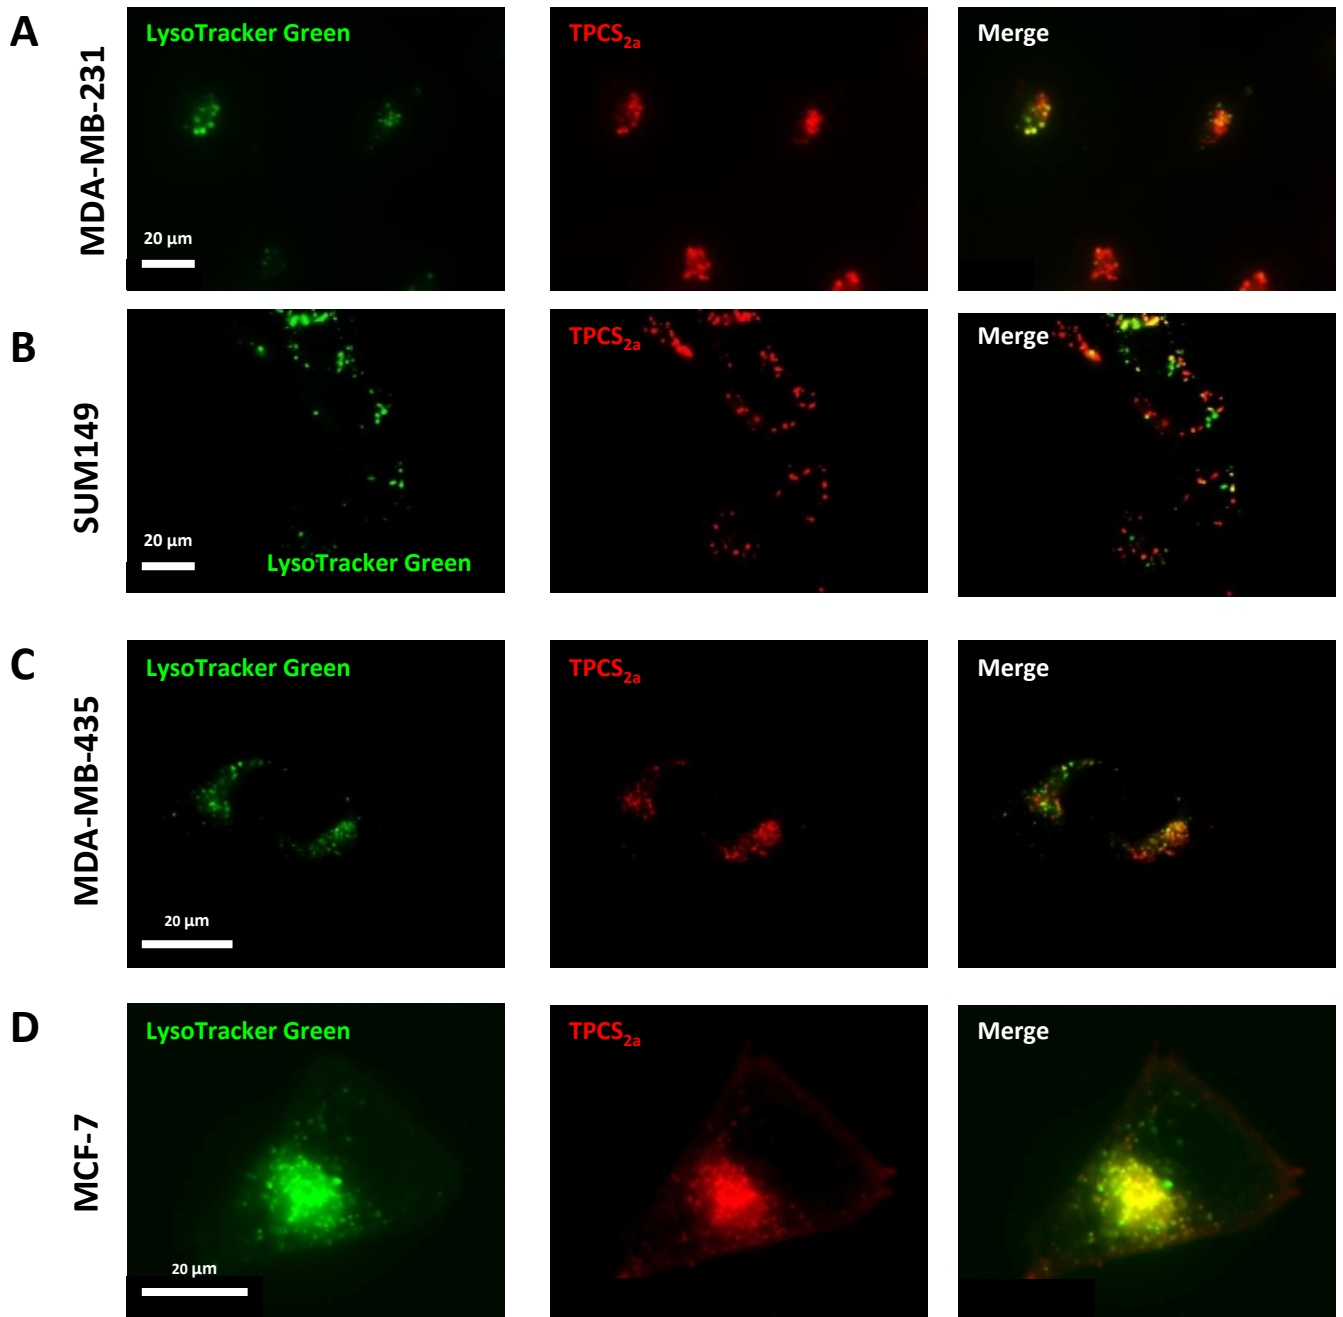

**Supplementary Figure S3. Co-localization of TPCS<sub>2a</sub> and LysoTracker Green (LTG) in the human breast cancer cell panel.** Subcellular localization of the PCI-photosensitizer TPCS<sub>2a</sub> and LTG in **A)** MDA-MB-231, **B)** SUM149, **C)** MDA-MB-435 and **D)** MCF-7. Cells were incubated for 18 hrs in medium containing TPCS<sub>2a</sub> (1 μg/ml) and chased for 4 hrs in fresh medium prior to examination by epi-fluorescence microscopy. LTG (1 μM) was added to the medium 1 hrs prior to microscopy. Micrographs shows reproduced and representative cells with fluorescence of the dyes.

# Supplementary Fig. 4

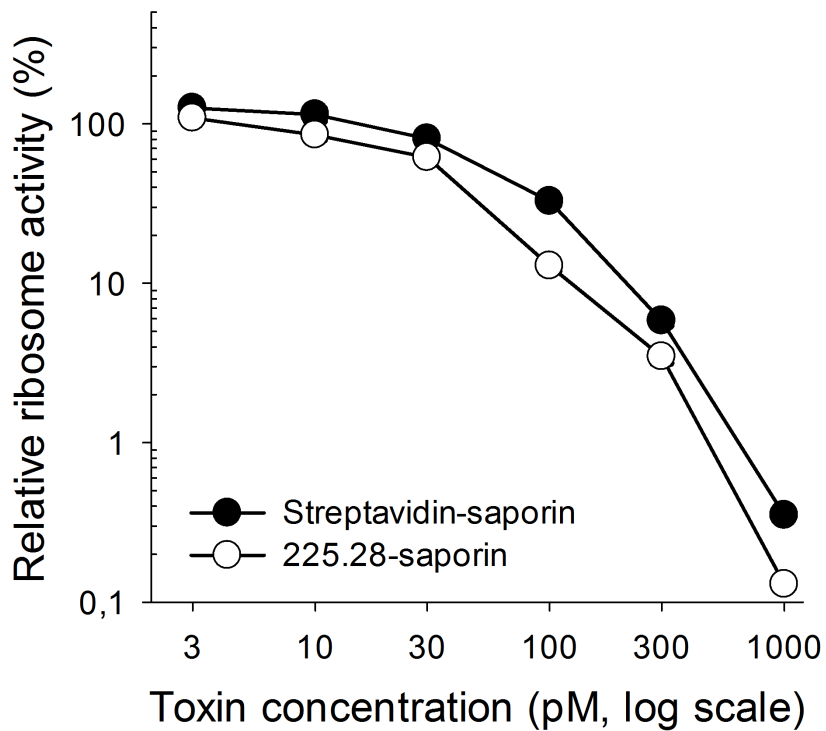

**Supplementary Figure S4. Ribosome-inhibiting activity of 225.28-saporin compared to streptavidin-saporin in a cell-free system.** The ribosome activity was evaluated by the transcription and translation of the luciferase enzyme and subsequent luminescent quantification by the addition of luciferin. Relative values calculated from a control sample with no added toxin. Figure shows a single representative experiment out of three independent experiments. Bars = SD of three technical replicates (bars smaller than the symbols).

# Supplementary Fig. 5

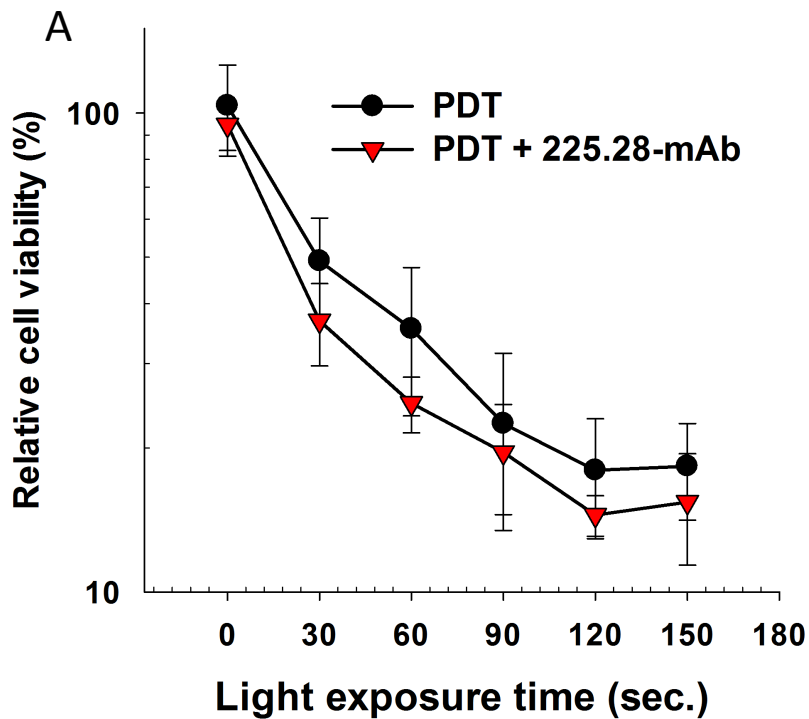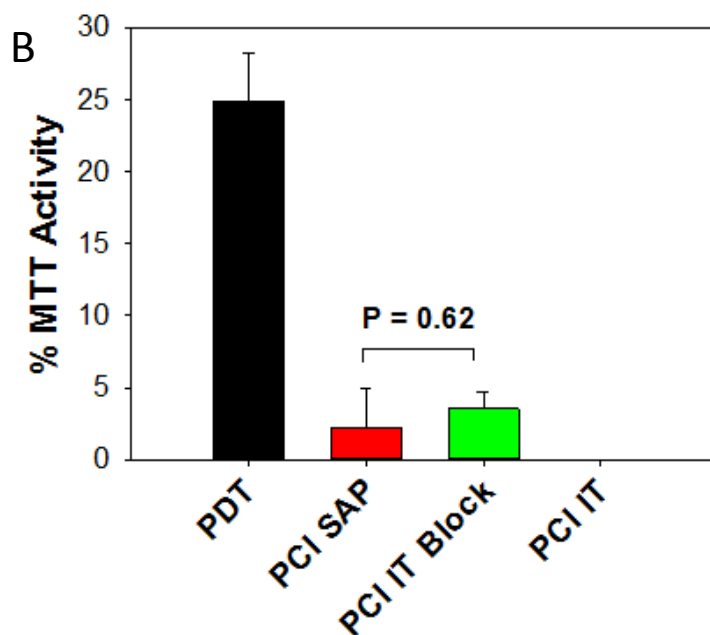

## Supplementary Figure S5. Effect of combining PDT and 225.28 mAb and blocking CSPG4 prior to PCI.

A) MDA-MB-435 cells was incubated with 0.2  $\mu\text{g}/\text{ml}$  TPCS<sub>2a</sub> (PDT), or TPCS<sub>2a</sub> in combination with 1 nM 225.28-mAb for 18 hrs, chased in drug-free medium and illuminated after 4 hrs. B) Blocking CSPG4 with 100-fold excess, 500 nM 225.28 mAb prior to PCI of 5 nM 225.28-saporin results in abolishment of the enhanced targeting effect of the immunotoxin (IT) 225.28-saporin in the MDA-MB-435 cells. While the viability of the cells were reduced by 100% in the PCI IT group, there were no significant differences between PCI SAP (PCI of saporin) and PCI IT Block (pre-block and block with 500 nM 225.28 mAb + PCI of 5 nM 225.28-saporin). Relative cell viability was examined using the MTT assay 48 hrs post illumination. Figures shows single representative experiments out of three independent experiments. Bars = SD of three technical replicates.

# Supplementary Fig. 6

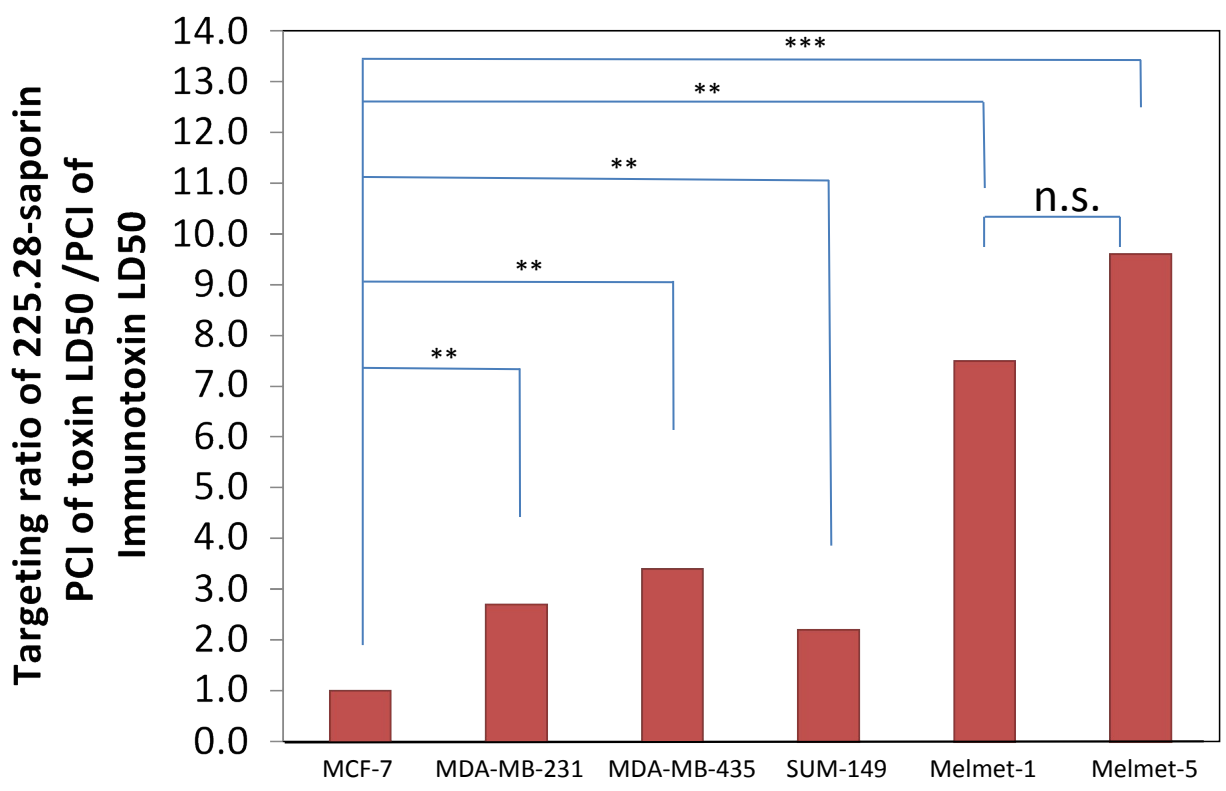

**Supplementary Figure S6. Fold increase targeting capacity of 225.28-saporin versus Saporin.** For each experiment (n = 3-9 independent experiments per cell line, MTT with technical triplicates and clonal cell survival with duplicates) with PCI of 225-28-saporin and PCI of saporin, the light exposure time (min) needed to obtain 50% reduction in cell viability or clonal cell survival after PCI of saporin was divided on the light exposure time (min) needed to obtain 50% reduction in cell viability or clonal cell survival after PCI of 225.28-saporin. The bars shows the average ratio with standard deviation bars. \*\* = P<0.01 and \*\*\*\* = P<0.0001

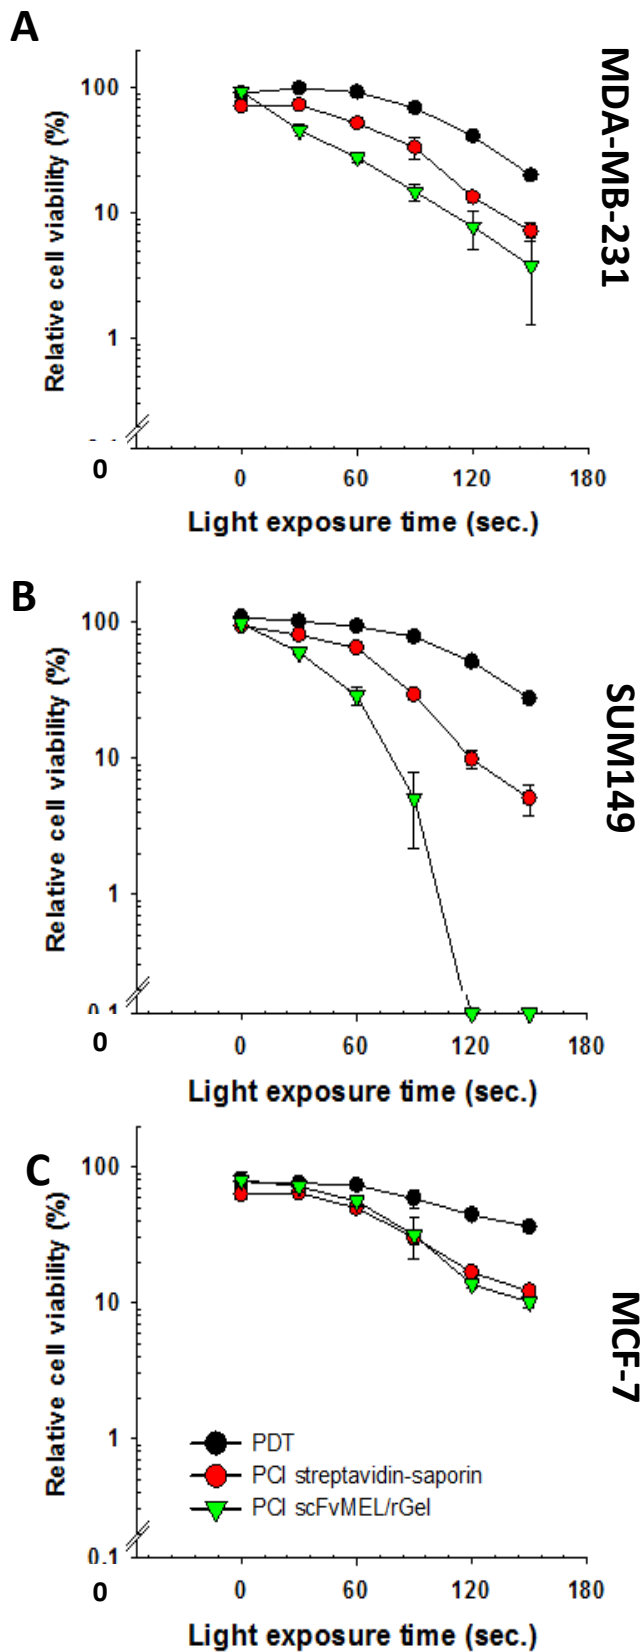

**Supplementary Figure S7. Specific and cytotoxic effects of PCI of scFvMEL/rGel in CSPG4-expressing TNBC cells.** **A)** MDA-MB-231 cells incubated with 0.2  $\mu\text{g/ml}$  TPCS2a with or without 1 nM scFvMEL/rGel or rGel. **B)** SUM149 cells incubated with 0.05  $\mu\text{g/ml}$  TPCS2a with or without 1 nM scFvMEL/rGel or rGel. **C)** MCF-7 cells incubated with 0.6  $\mu\text{g/ml}$  TPCS<sub>2a</sub> with or without 5 nM scFvMEL/rGel or rGel. 18 hrs post incubation start, cells were washed, chased and examined by the MTT assay 48-72 hrs post light exposure. Figures shows a Single representative experiment out of three independent experiments. Bars = SD of three technical replicates.



# Supplementary Fig. 8

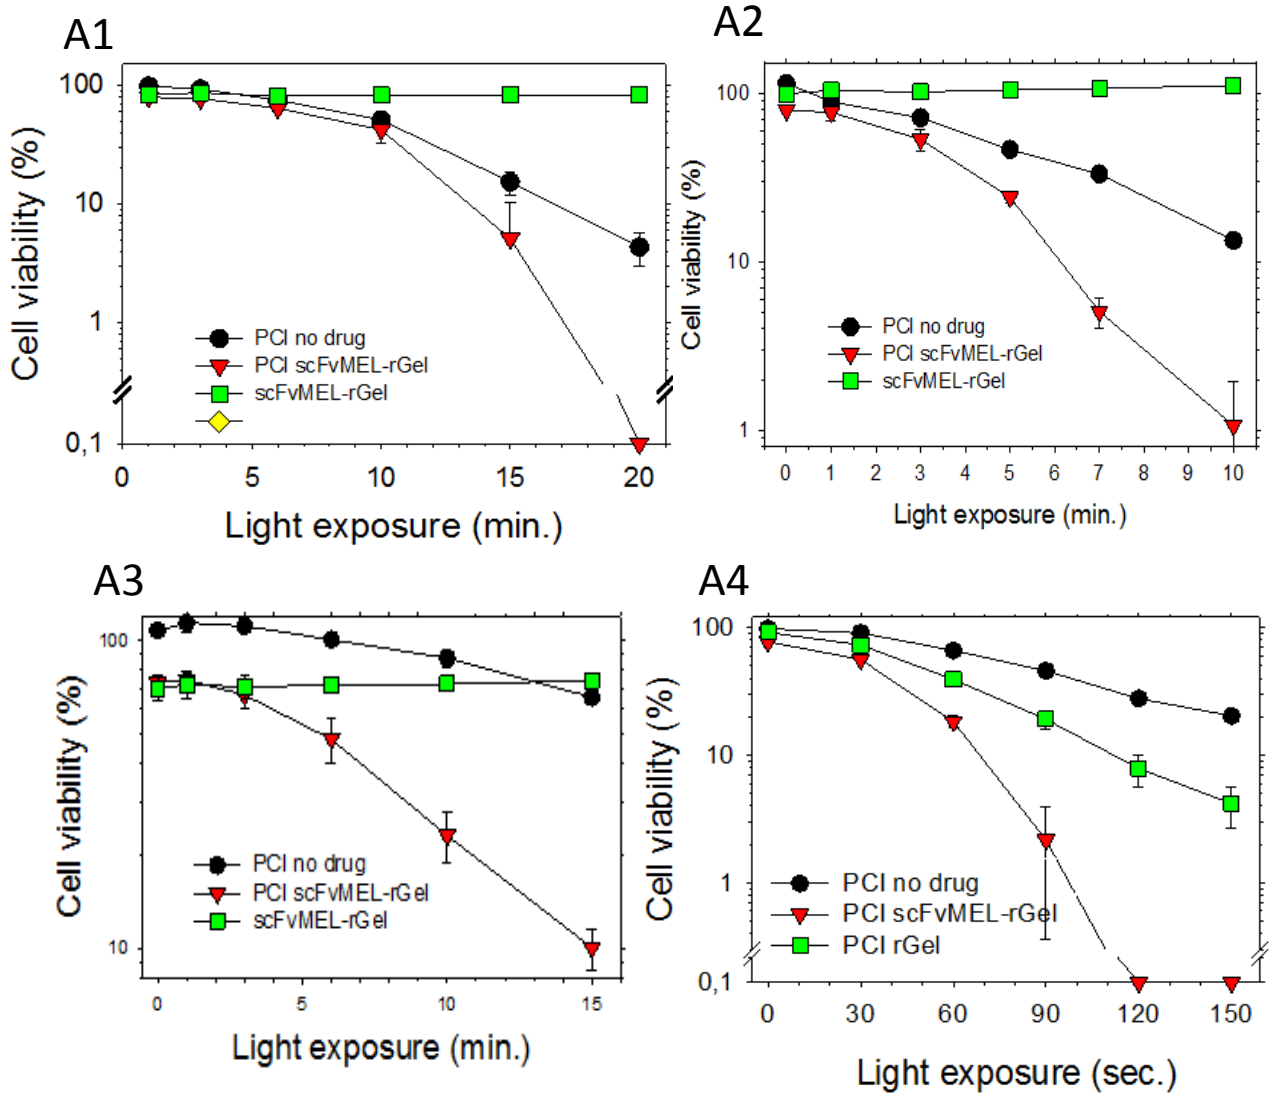

**Supplementary Figure S8. Specific and cytotoxic effects of PCI of scFvMEL-rGel in the CSPG4-expressing A-375/A-375-GFP cells (Repetition of experiments based on fig 5a). A1-3:** The cells were incubated with 5  $\mu\text{g}/\text{ml}$  AIPc2a +/- 100 nM scFvMEL-rGel or rGel. Cells were also incubated with the scFvMEL-rGel alone. **A4:** Cells incubated with 0.2  $\mu\text{g}/\text{ml}$  TPPS2a +/- 16.5 nM scFvMEL-rGel or rGel. 18 hrs post incubation start, cells were washed and then chased in drug-free medium for 4 hrs. Finally, cells were examined by the MTT assay 48-72 hrs post light exposure. Figure shows single experiments. Bars = SD of three technical replicates.

# Supplementary Fig. 9

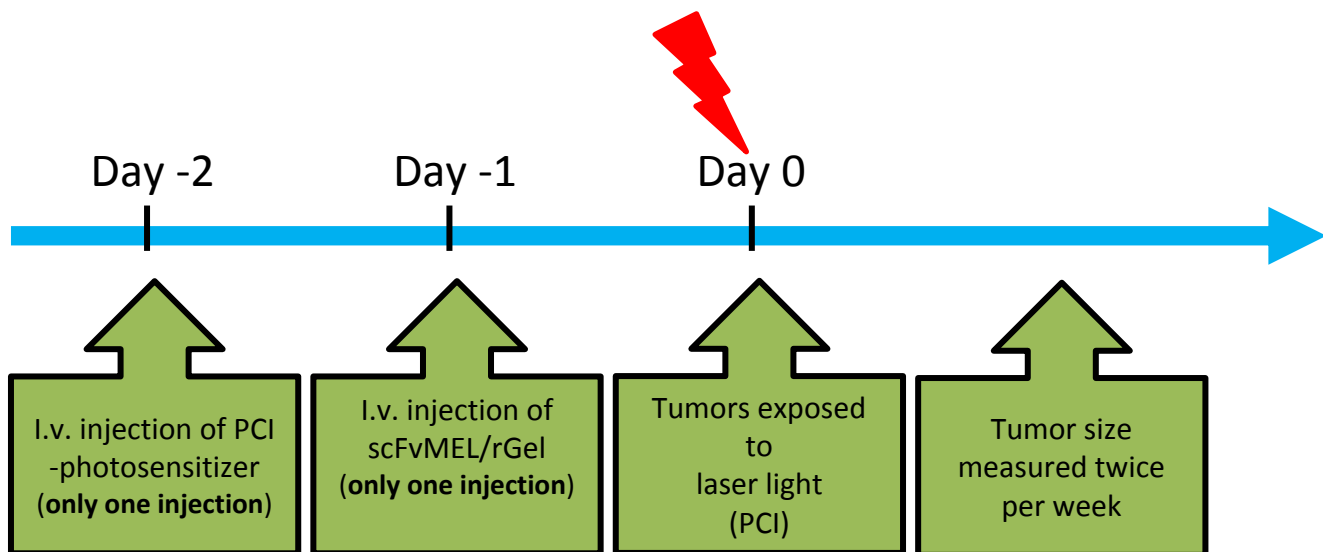

**Supplementary Figure S9. Experimental design of *in vivo* PCI of scFvMEL-rGel .** PCI Photosensitizer was intravenously (i.v.) injected 48h prior to PCI (laser-activation) of Immunotoxin, which was injected i.v. 24h prior to light. Tumor growth or reduction was measured by a digital caliper twice per week.

## Supplementary Table 1.

|                                 | MDA-MB-231  | MDA-MB-435  | Sum149      | Melmet 1 | Melmet 5 | Melmet 1    | Melmet 5    |
|---------------------------------|-------------|-------------|-------------|----------|----------|-------------|-------------|
| Avarage lethality PCI (no drug) | 50%         | 50%         | 50%         | 50%      | 50%      | 70%         | 80%         |
| Avarage lethality IT            | 12%         | 41%         | 20%         | 72%      | 69%      | 72%         | 69%         |
| DL                              | 1.78        | 0.73        | 3.52        | -0.25    | -0.14    | 2.03        | 1.54        |
| Se(DL)                          | 0.22        | 0.28        | 1.31        | 0.23     | 0.44     | 0.91        | 0.50        |
| T-value                         | 8.21        | 2.59        | 2.68        | -1.06    | -0.33    | 2.23        | 3.08        |
| df                              | 8           | 8           | 8           | 8        | 8        | 8           | 8           |
| p-value                         | < 0.001     | 0.0330      | 0.0280      | 0.4760   | 0.7520   | 0.0284      | 0.0075      |
| Combined effect                 | Synergistic | Synergistic | Synergistic | Additive | Additive | Synergistic | Synergistic |

**Supplementary Table 1.** Statistical analysis of the combined effect of PCI<sub>no drug</sub> (= photosensitizer + light) and and Immunotoxin (IT). A synergistic combination of the two treatment was defined as a significant positive DL (difference in logarithm) value (t-test;  $p \leq 0.05$ ). se(DL): standard error of DL, df: degrees of freedom.
